# Supplementary material for: Suppression of Methylation-Mediated Transcriptional Gene Silencing by βC1-SAHH Protein Interaction during Geminivirus-Betasatellite Infection
Source: PubMed Central journal article supplement (PMC3197609; doi:10.1371/journal.ppat.1002329), 2011-10-20
Supplement: ppat.1002329.s002.pdf [file ppat.1002329.s002.pdf]

**Figure S2**

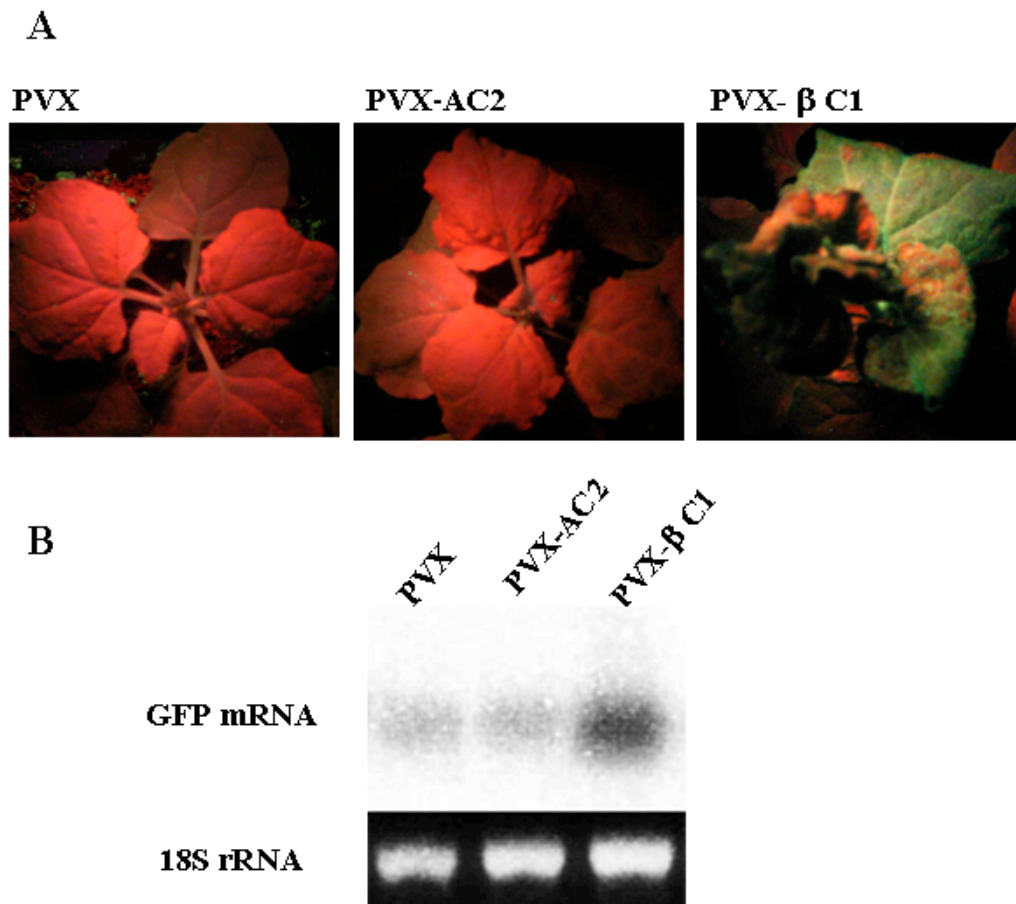

**Figure S2. TYLCCNV AC2 expression cannot reverse TGS of a GFP transgene.** (A) 16-TGS plants were inoculated with the PVX vector, PVX expressing AC2 from TYLCCNV (PVX-AC2), or PVX expressing  $\beta$ C1 (PVX- $\beta$ C1), and were photographed under UV light 14 days post-inoculation. Results shown are representative of at least three independent experiments with 4 to 8 plants per treatment. (B) Gel blot analysis of RNA from leaves of 16-TGS plants inoculated as indicated. The  $^{32}$ P-labeled probe was specific for GFP mRNA. The 18S rRNA loading controls were visualized by ethidium bromide staining.
