# Supplementary material for: Suppression of Methylation-Mediated Transcriptional Gene Silencing by βC1-SAHH Protein Interaction during Geminivirus-Betasatellite Infection
Source: PubMed Central journal article supplement (PMC3197609; doi:10.1371/journal.ppat.1002329), 2011-10-20
Supplement: ppat.1002329.s003.pdf [file ppat.1002329.s003.pdf]

**TABLE S1.** Sequences of primers used in this study

| <b>Primer</b>         | <b>Primer sequence (5'-3')</b>          | <b>Length</b> |
|-----------------------|-----------------------------------------|---------------|
| MeA1/F                | ATTGGATGAGGATATGTAGGTGAG                | 24            |
| MeA1/R                | TACTTAATTACTAACATACACCTAAAACCA          | 30            |
| MeA2/F                | GTATATGGTTTTAGGTGTATGTTAG               | 25            |
| MeA2/R                | TTCATCCATCCATATCTTCCCA                  | 23            |
| MeA3/F                | GTGTTGGTAAGAGGTTTTGTGTTA                | 24            |
| MeA3/R                | CCTACAAAATCTAAACTCATTTACATCCT           | 29            |
| MeA4/F                | AGGTTTGAGGATGTAAATGAGT                  | 22            |
| MeA4/R                | ACCCACAATCTTCCTCTACAATCC                | 24            |
| MeA5/F                | TGGAATTGGGTTTTGGATTG                    | 20            |
| MeA5/R                | CTCCTCCAATTAACAAATATATTTCTCCATT         | 31            |
| MeA6/F                | TGGTTAAAAGAAGAATAAGAAAATGGAG            | 28            |
| MeA6/R                | CCCTAAAACCCCAATTACTAAAT                 | 24            |
| Y10 $\beta$ C1-ClaI/F | ATCGATATGACTATCAAATACAAC                | 24            |
| Y10 $\beta$ C1-SalI/R | GTCGACTCATACATCTGAATTTG                 | 23            |
| Y10 $\beta$ C1-XhoI/F | CTCGAGACTATCAAATACAAC                   | 21            |
| Y10 $\beta$ C1-SpeI/R | ACTAGTTCATACATCTGAATTTG                 | 23            |
| F-box RT/F            | AAAATCAGGTTCTGGAAAGG                    | 20            |
| F-box RT/R            | TCCCAGAGATCAGCATTGG                     | 20            |
| Actin RT/F            | AGTATTGTTGGTCGTCCTAG                    | 20            |
| Actin RT/R            | AAGAACTGCTCTTGGCTGTC                    | 20            |
| Y10 $\beta$ C1-PacI/F | TTAATTAACATGACTATCAAATACAAC             | 27            |
| Y10 $\beta$ C1-AscI/R | GGCGCGCCCTACATCTGAATTTG                 | 23            |
| SAHH-PacI/F           | TTAATTAACATGGCGTTGCTCGTCGAGAAG          | 30            |
| SAHH-AscI/R           | GGCGCGCCCTCAGTACCTGTAGTGAGGAGGC         | 31            |
| TRBO-SAHH/F           | GCGGGATCCTTAATTAAGGCCATGGCGTTGCTCGTCGAG | 39            |
| TRBO-SAHH/R           | GCGCTGCAGGCGCGCCACTAGTCAGTACCTGTAGTGAGG | 39            |
| GST- $\beta$ C1/F     | GCGGATCCTTAATTAAGGACATGTATCATCCACAACAAA | 39            |
| GST- $\beta$ C1/R     | GCGTCTAGAGGCGCGCCCTACATCTGAATTTGTAAATAC | 39            |
