# Supplementary material for: Suppression of Methylation-Mediated Transcriptional Gene Silencing by βC1-SAHH Protein Interaction during Geminivirus-Betasatellite Infection
Source: PLOS journal article supplement (doi:10.1371/journal.ppat.1002329), 2011-10-20
Supplement: S1 (10.1371/journal.ppat.1002329.s001) [file journal.ppat.1002329.s001]

Figure S1

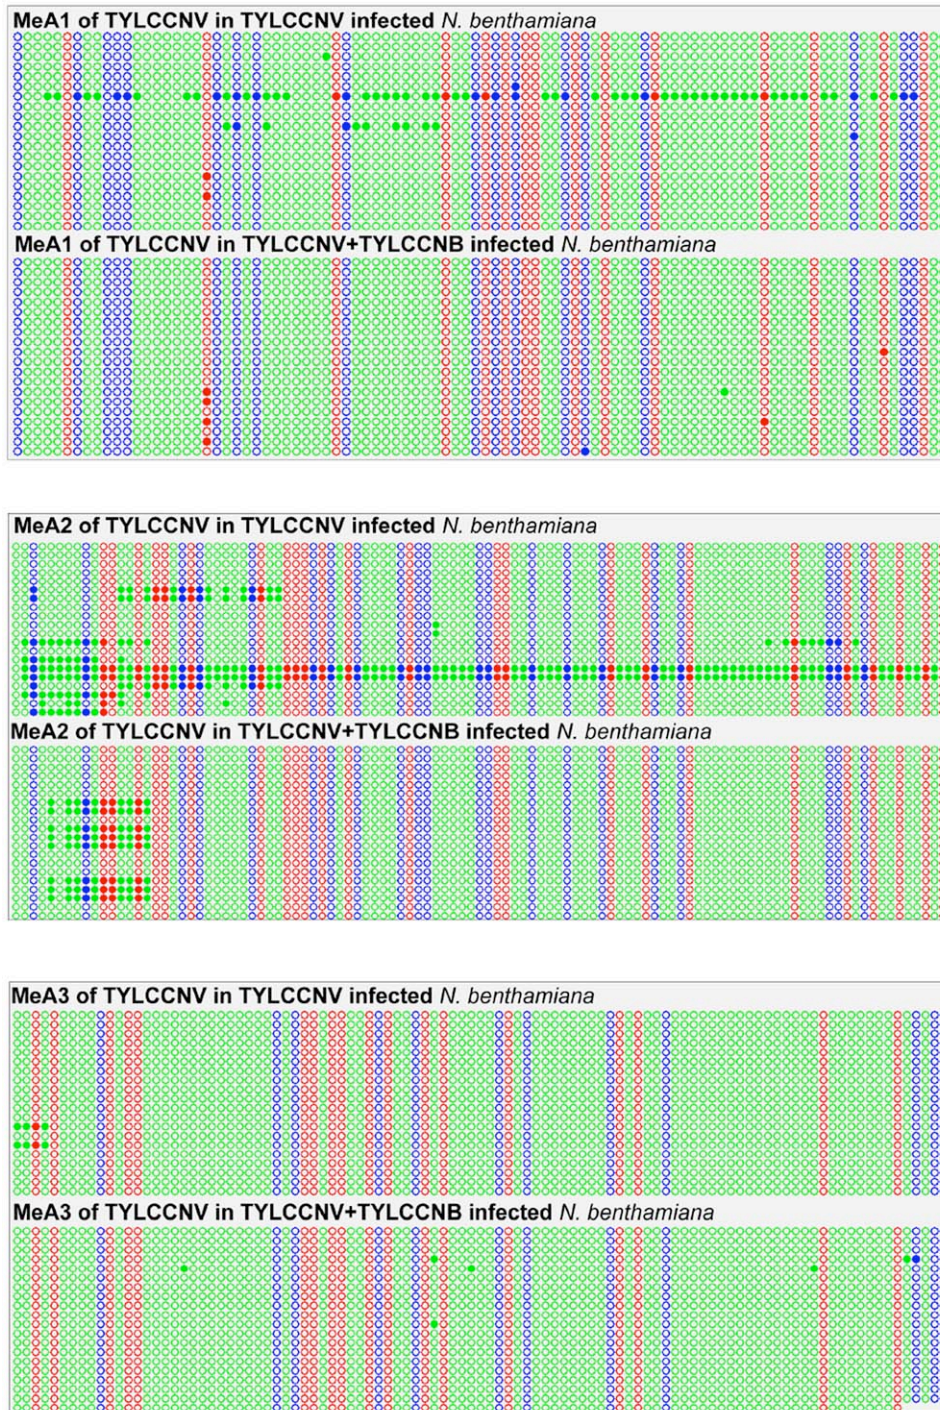

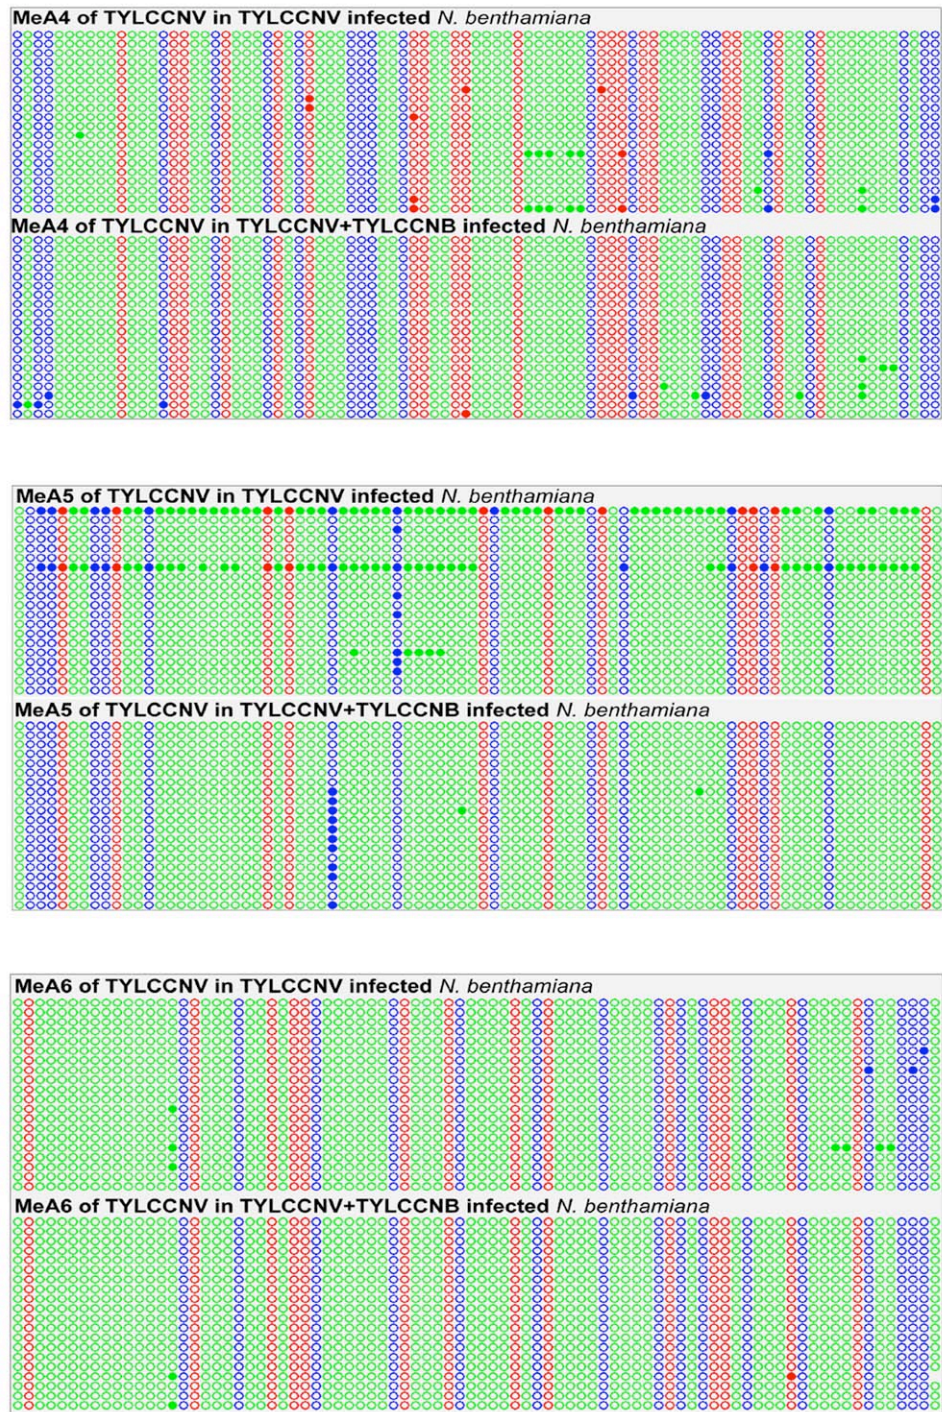

**Figure S1.** Bisulfite sequencing of clones from TYLCCNV genome fragments MeA1 to MeA6. *N. benthamiana* plants were inoculated with TYLCCNV alone or co-inoculated with TYLCCNV+TYLCCNB. Methylation of the six TYLCCNV fragments was assessed by bisulfite sequencing. Twenty clones were sequenced for each fragment. The circles represent cytosines in each fragment and are color coded according to sequence context (red CG, green CHH, blue CNG). Filled circles indicate methylation, and each line represents the sequence of an individual clone. PCR primers used to amplify viral DNA fragments are listed in Table S1.
